# Supplementary material for: Proteomic Analysis of Mucosal and Systemic Responses to SARS-CoV-2 Antigen
Source: MDPI journal article supplement (doi:10.3390/vaccines11020334), 2023-02-02
Supplement: s1 [file s1]

**Table S4.** List of differentially expressed proteins in nasal and oral explant culture supernatants<sup>1</sup>.

| Protein               | Definition <sup>2</sup>                                       | Oral vs. Nasal FC | <i>P</i> value |
|-----------------------|---------------------------------------------------------------|-------------------|----------------|
| IL-7                  | Homo sapiens interleukin 7                                    | 0.734             | 0.2461         |
| IL-6                  | Homo sapiens interleukin 6                                    | 1.061             | 0.5790         |
| G-CSF                 | Homo sapiens granulocyte colony-stimulating factor receptor   | 0.925             | 0.8097         |
| IL-8                  | Homo sapiens interleukin 8                                    | 0.328             | 0.1297         |
| MCP-1                 | Homo sapiens monocyte chemotactic protein-induced protein 1   | 1.350             | 0.4771         |
| MIP-3 $\alpha$ /CCL20 | Homo sapiens macrophage inflammatory protein 3 alpha          | 0.792             | 0.1788         |
| GM-CSF                | Homo sapiens granulocyte-macrophage colony-stimulating factor | 2.374             | 0.0050         |
| IP-10/CXCL10          | Homo sapiens 10 kDa interferon gamma-induced protein          | 2.431             | 0.2313         |
| MIG/CXCL9             | Homo sapiens monokine-induced by interferon gamma             | 1.209             | 0.3112         |
| IL-16                 | Homo sapiens interleukin 16                                   | 1.054             | 0.1436         |
| IL-2                  | Homo sapiens interleukin 2                                    | 2.025             | 0.0260         |
| MCP-2/CCL8            | Homo sapiens monocyte chemoattractant protein 2               | 1.067             | 0.0367         |
| IL-4                  | Homo sapiens interleukin 4                                    | 1.018             | 0.1120         |
| MIP-1 $\beta$ /CCL4   | Homo sapiens macrophage inflammatory protein 1 beta           | 1.128             | 0.7016         |
| SDF-1 $\beta$         | Homo sapiens stromal cell-derived factor 1 beta               | 1.081             | 0.6216         |
| IFN- $\gamma$         | Homo sapiens interferon-gamma                                 | 1.149             | 0.3350         |
| IFN- $\beta$          | Homo sapiens interferon-beta                                  | 1.196             | 0.0176         |
| TNF- $\alpha$         | Homo sapiens tumor necrosis factor alpha                      | 1.691             | 0.0241         |
| IL-12                 | Homo sapiens interleukin 12                                   | 1.788             | 0.0359         |
| RANTES/CCL5           | Homo sapiens chemokine (C-C motif) ligand 5                   | 13.346            | 0.0411         |
| IL-1 $\alpha$         | Homo sapiens interleukin 1 alpha                              | 20.116            | 0.0618         |
| TGF- $\beta$          | Homo sapiens transforming growth factor beta                  | 0.505             | 0.5063         |
| IL-1 $\beta$          | Homo sapiens interleukin 1 beta                               | 3.937             | 0.0175         |
| IL-15                 | Homo sapiens interleukin 15                                   | 1.520             | 0.0090         |
| IL-17                 | Homo sapiens interleukin 17                                   | 0.422             | 0.0128         |
| L-Selectin            | Homo sapiens leukocyte-endothelial cell adhesion molecule 1   | 0.379             | 0.0291         |
| Elafin                | Homo sapiens elastase-specific inhibitor,                     | 1.519             | 0.2081         |
| IL-10                 | Homo sapiens interleukin 10                                   | 0.651             | 0.0853         |
| HBD4                  | Homo sapiens beta defensin 4                                  | 0.839             | 0.0110         |
| HBD3                  | Homo sapiens beta defensin 3                                  | 0.633             | 0.1863         |
| SLP1                  | Homo sapiens secretory leukocyte protease inhibitor 1         | 0.407             | 0.1414         |
| HNP-1-3               | Homo sapiens alpha-defensin/human neutrophil peptide 1-3      | 0.459             | 0.0512         |
| P-Selectin            | Homo sapiens leukocyte-endothelial cell adhesion molecule 3   | 0.534             | 0.0755         |

<sup>1</sup>Significance determined by unpaired *t* test with a Benjamini-Hochberg multiple testing correction (*P* < 0.05).<sup>2</sup>UnitProt definitions.

FC: Fold change.
