# Supplementary material for: Proteomic Analysis of Mucosal and Systemic Responses to SARS-CoV-2 Antigen
Source: MDPI journal article supplement (doi:10.3390/vaccines11020334), 2023-02-02
Supplement: s1 [file s1]

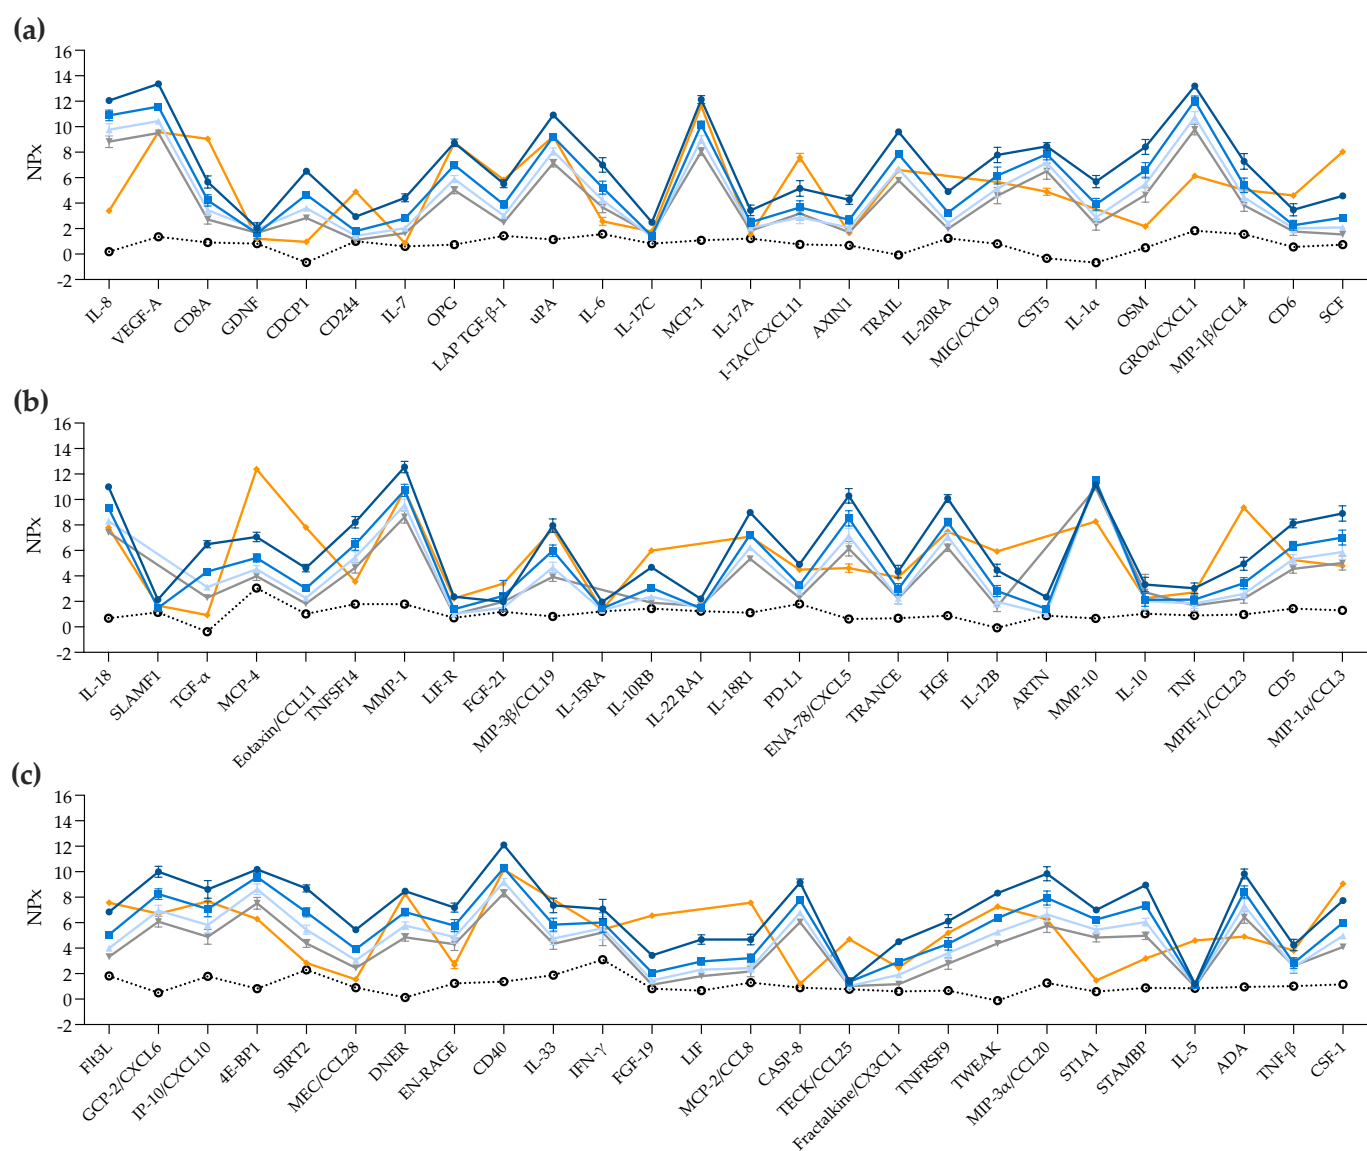

**Figure S1.** Optimization of nasopharyngeal (NP) secretions dilution for Olink assay. Secretions eluted from NP swabs were analyzed on the Olink platform undiluted (●) and at three dilutions, 1:4 (■), 1:8 (▲) and 1:16 (▼). Normalized protein expression (NPx) data for NP secretions and undiluted plasma (◆) above the lower limit of detection (○) are shown as mean (± SEM) of all participants. One technical replicate was analyzed per sample, per dilution for each participant.
