# Supplementary material for: Proteomic Analysis of Mucosal and Systemic Responses to SARS-CoV-2 Antigen
Source: MDPI journal article supplement (doi:10.3390/vaccines11020334), 2023-02-02
Supplement: s1 [file s1]

**Table S2.** List of differentially expressed proteins in nasopharyngeal (NP) swabs and plasma<sup>1</sup>.

| Protein              | Definition <sup>2</sup>                                                    | NP Swab vs. Plasma FC | P value  |
|----------------------|----------------------------------------------------------------------------|-----------------------|----------|
| IL-8                 | Homo sapiens interleukin 8                                                 | 3.541                 | < 0.0001 |
| VEGF-A               | Homo sapiens vascular endothelial growth factor-A                          | 1.394                 | < 0.0001 |
| CD8A                 | Homo sapiens T-cell surface glycoprotein CD8 alpha chain                   | 0.627                 | < 0.0001 |
| GDNF                 | Homo sapiens glial cell line-derived growth factor                         | 3.432                 | 0.0054   |
| CDCP1                | Homo sapiens CUB domain containing protein 1                               | 6.774                 | < 0.0001 |
| CD244                | Homo sapiens natural killer cell receptor 2B4                              | 0.565                 | < 0.0001 |
| IL-7                 | Homo sapiens interleukin 7                                                 | 8.055                 | < 0.0001 |
| OPG                  | Homo sapiens osteoprotegerin                                               | 1.001                 | 0.9691   |
| LAP TGF- $\beta$ -1  | Homo sapiens latency-associated peptide and mature TGF-beta 1              | 0.947                 | 0.3694   |
| uPA                  | Homo sapiens uterine-specific proline-rich acidic protein                  | 1.181                 | < 0.0001 |
| IL-6                 | Homo sapiens interleukin 6                                                 | 3.554                 | < 0.0001 |
| IL-17C               | Homo sapiens interleukin 17C                                               | 1.495                 | 0.0072   |
| MCP-1                | Homo sapiens monocyte chemotactic protein-induced protein 1                | 1.042                 | 0.1547   |
| IL-17A               | Homo sapiens interleukin 17A                                               | 3.460                 | < 0.0001 |
| I-TAC/CXCL11         | Homo sapiens interferon inducible T-cell alpha chemokine                   | 0.679                 | 0.0015   |
| AXIN1                | Homo sapiens axis inhibition protein 1                                     | 2.564                 | < 0.0001 |
| TRAIL                | Homo sapiens TNF-related apoptosis-inducing ligand                         | 1.455                 | < 0.0001 |
| IL-20RA              | Homo sapiens Interleukin-20 receptor subunit alpha                         | N/A                   | N/A      |
| MIG/CXCL9            | Homo sapiens monokine-induced by interferon gamma                          | 1.376                 | 0.0024   |
| CST5                 | Homo sapiens cystatin-5                                                    | 1.727                 | < 0.0001 |
| IL-1 $\alpha$        | Homo sapiens interleukin 1 alpha                                           | N/A                   | N/A      |
| OSM                  | Homo sapiens oncostatin-M                                                  | 3.857                 | < 0.0001 |
| GRO $\alpha$ /CXCL1  | Homo sapiens growth regulated protein alpha                                | 2.146                 | < 0.0001 |
| MIP-1 $\beta$ /CCL4  | Homo sapiens macrophage inflammatory protein 1-beta                        | 1.447                 | 0.0011   |
| CD6                  | Homo sapiens T-cell differentiation antigen CD6                            | 0.757                 | 0.0307   |
| SCF                  | Homo sapiens stem cell factor                                              | 0.569                 | < 0.0001 |
| IL-18                | Homo sapiens interleukin 18                                                | 1.411                 | < 0.0001 |
| SLAMF1               | Homo sapiens signalling lymphocytic activation molecule family member 1    | 0.589                 | 0.1150   |
| TGF- $\alpha$        | Homo sapiens protransforming growth factor alpha                           | 6.952                 | < 0.0001 |
| MCP-4/CCL13          | Homo sapiens monocyte chemoattractant protein 4                            | 0.571                 | < 0.0001 |
| Eotaxin/CCL11        | Homo sapiens eotaxin                                                       | 0.591                 | < 0.0001 |
| TNFSF14              | Homo sapiens tumor necrosis factor receptor superfamily member 14          | 2.311                 | < 0.0001 |
| MMP-1                | Homo sapiens matrix metalloproteinase-1                                    | 1.168                 | 0.0016   |
| LIF-R                | Homo sapiens leukemia inhibitory factor receptor                           | 1.057                 | 0.5694   |
| FGF-21               | Homo sapiens fibroblast growth factor 21                                   | 0.204                 | < 0.0001 |
| MIP-3 $\beta$ /CCL19 | Homo sapiens macrophage inflammatory protein 3 beta                        | 1.037                 | 0.6194   |
| IL-15RA              | Homo sapiens interleukin-15 receptor subunit alpha                         | 22.173                | < 0.0001 |
| IL-10RB              | Homo sapiens interleukin-10 receptor subunit beta                          | 0.783                 | < 0.0001 |
| IL-22RA1             | Homo sapiens interleukin-22 receptor subunit alpha-1                       | N/A                   | N/A      |
| IL-18R1              | Homo sapiens interleukin-18 receptor 1                                     | 1.268                 | < 0.0001 |
| PD-L1                | Homo sapiens programmed death ligand 1                                     | 1.093                 | 0.1619   |
| ENA-78/CXCL5         | Homo sapiens epithelial neutrophil activating peptide 78                   | 2.231                 | < 0.0001 |
| TRANCE               | Homo sapiens TNF-related activation-induced cytokine                       | 1.048                 | 0.7341   |
| HGF                  | Homo sapiens hepatocyte growth factor                                      | 1.348                 | < 0.0001 |
| IL-12B               | Homo sapiens interleukin-12 subunit beta                                   | 0.751                 | 0.0075   |
| ARTN                 | Homo sapiens artemin                                                       | N/A                   | N/A      |
| MMP-10               | Homo sapiens matrix metalloproteinase-10                                   | 1.349                 | < 0.0001 |
| IL-10                | Homo sapiens interleukin 10                                                | 1.201                 | 0.4992   |
| TNF                  | Homo sapiens tumor necrosis factor                                         | 0.988                 | 0.9442   |
| MPIF-1/CCL23         | Homo sapiens myeloid progenitor inhibitory factor 1                        | 0.529                 | < 0.0001 |
| CD5                  | Homo sapiens T-cell surface glycoprotein CD5                               | 1.550                 | < 0.0001 |
| MIP-1 $\alpha$ /CCL3 | Homo sapiens macrophage inflammatory protein 1-alpha                       | 1.861                 | < 0.0001 |
| Flt3L                | Homo sapiens Fms-related tyrosine kinase 3 ligand                          | 0.903                 | 0.0189   |
| GCP-2/CXCL6          | Homo sapiens gamma-tubulin complex component 2                             | 1.489                 | < 0.0001 |
| IP-10/CXCL10         | Homo sapiens 10 kDa interferon gamma-induced protein                       | 1.122                 | 0.2051   |
| 4E-BP1               | Homo sapiens eukaryotic translation initiation factor 4E-binding protein 1 | 1.618                 | < 0.0001 |
| SIRT2                | Homo sapiens NAD-dependent protein deacetylase sirtuin-2                   | 17.336                | < 0.0001 |
| MEC/CCL28            | Homo sapiens mucosae-associated epithelial chemokine                       | 3.742                 | < 0.0001 |
| DNER                 | Homo sapiens delta and Notch-like epidermal growth factor-related receptor | 1.024                 | 0.4833   |

|                       |                                                                                                                     |        |          |
|-----------------------|---------------------------------------------------------------------------------------------------------------------|--------|----------|
| EN-RAGE               | Homo sapiens extracellular newly identified RAGE (Receptor for Advanced Glycosylation End products)-binding protein | 2.839  | < 0.0001 |
| CD40                  | Homo sapiens B-cell surface antigen CD40                                                                            | 1.190  | < 0.0001 |
| IL-33                 | Homo sapiens interleukin 33                                                                                         | N/A    | N/A      |
| IFN- $\gamma$         | Homo sapiens interferon-gamma                                                                                       | 1.294  | 0.0524   |
| FGF-19                | Homo sapiens fibroblast growth factor 19                                                                            | 0.522  | < 0.0001 |
| LIF                   | Homo sapiens leukemia inhibitory factor                                                                             | N/A    | N/A      |
| MCP-2/CCL8            | Homo sapiens monocyte chemoattractant protein 2                                                                     | 0.617  | < 0.0001 |
| CASP-8                | Homo sapiens caspase-8                                                                                              | 14.314 | < 0.0001 |
| TECK/CCL25            | Homo sapiens thymus-expressed chemokine                                                                             | 0.245  | < 0.0001 |
| Fractalkine/CX3CL1    | Homo sapiens fractalkine                                                                                            | 1.828  | < 0.0001 |
| TNFRSF9               | Homo sapiens tumor necrosis factor receptor superfamily member 9                                                    | 1.179  | 0.0971   |
| TWEAK                 | Homo sapiens TNF-related weak inducer of apoptosis                                                                  | 1.145  | 0.0001   |
| MIP-3 $\alpha$ /CCL20 | Homo sapiens macrophage inflammatory protein 3 alpha                                                                | 1.573  | < 0.0001 |
| ST1A1                 | Homo sapiens aryl sulfotransferase 1                                                                                | 27.131 | < 0.0001 |
| STAMBP                | Homo sapiens STAM (Signal Transducing Adapter Molecule)-binding protein                                             | 2.812  | < 0.0001 |
| IL-5                  | Homo sapiens interleukin 5                                                                                          | 3.118  | 0.0720   |
| ADA                   | Homo sapiens adenosine deaminase                                                                                    | 2.000  | < 0.0001 |
| TNF- $\beta$          | Homo sapiens tumor necrosis factor beta                                                                             | 1.044  | 0.7420   |
| CSF-1                 | Homo sapiens macrophage colony-stimulating factor 1                                                                 | 0.855  | < 0.0001 |

<sup>1</sup>Significance determined by unpaired *t* test with a Benjamini-Hochberg multiple testing correction ( $P < 0.05$ ).

<sup>2</sup>UnitProt definitions.

FC: Fold change.

N/A: not applicable, protein not detectable in plasma.
