# Supplementary material for: Proteomic Analysis of Mucosal and Systemic Responses to SARS-CoV-2 Antigen
Source: MDPI journal article supplement (doi:10.3390/vaccines11020334), 2023-02-02
Supplement: s1 [file s1]

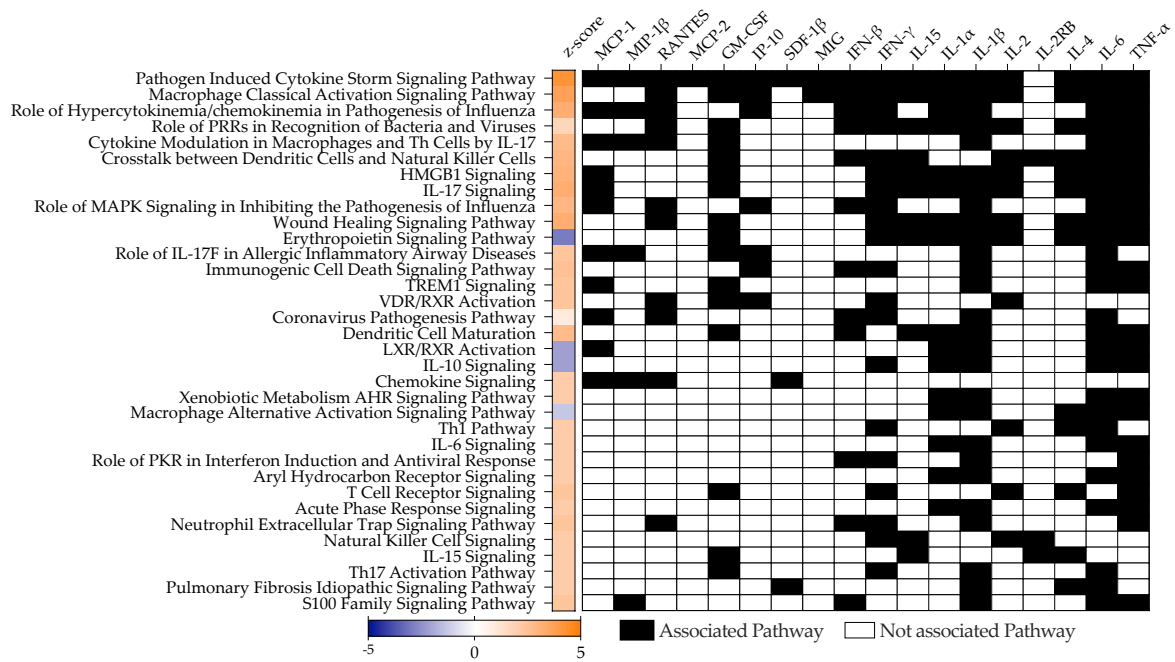

**Figure S5.** Canonical pathways significantly enriched in oral explant culture supernatants in comparison to nasal tissue. The activation z-scores determined by directionality (overabundance in orange and underabundance in blue) and number of cytokine/chemokine are represented by a heat map. The proteins associated to each pathway are shown in black cells. The pathways included had a minimum of two analytes associated and a  $p < 0.05$  (right-tailed Fisher exact test).
