# Supplementary material for: Proteomic Analysis of Mucosal and Systemic Responses to SARS-CoV-2 Antigen
Source: MDPI journal article supplement (doi:10.3390/vaccines11020334), 2023-02-02
Supplement: s1 [file s1]

**Table S1.** Baseline characteristics of COVAB study participants

| Characteristic                               | COVAB study (n=18) |             |
|----------------------------------------------|--------------------|-------------|
| Gender                                       | Female             | 7 (39%)     |
|                                              | Male               | 11 (61%)    |
| Age (years), mean (SD)                       |                    | 40.2 (14.8) |
| BMI, mean (SD)                               |                    | 27.3 (5.6)  |
| Living with HIV                              |                    | 0           |
| Currently smoking                            | No                 | 13 (72%)    |
|                                              | Yes                | 5 (28%)     |
| Diabetes                                     | No                 | 18 (100%)   |
|                                              | Yes                | 0 (0%)      |
| Hypertension                                 | No                 | 15 (83%)    |
|                                              | Yes                | 3 (17%)     |
| Asthma and/or COPD <sup>1</sup>              | No                 | 12 (67%)    |
|                                              | Yes                | 6 (33%)     |
| Previous positive COVID-19 test <sup>2</sup> | No                 | 14 (78%)    |
|                                              | Yes                | 4 (22%)     |
| COVID-19 vaccinated                          | No                 | 6 (33%)     |
|                                              | Yes                | 12 (67%)    |
| COVID-19 vaccine <sup>3</sup>                | BioNTech/Pfizer    | 11 (92%)    |
|                                              | J&J                | 1 (8%)      |
| Time since vaccination (weeks), mean (SD)    |                    | 19.8 (14.9) |
| Vaccinated and infected <sup>3,4</sup>       | No                 | 8 (67%)     |
|                                              | Yes                | 4 (33%)     |

<sup>1</sup> COPD: chronic obstructive pulmonary disease.

<sup>2</sup> Positive test at least 4 months before surgery.

<sup>3</sup> % calculated among number of vaccinated participants.

<sup>4</sup> Vaccinated individuals having tested positive for COVID-19 at least 4 months before surgery.
