# Supplementary material for: Proteomic Analysis of Mucosal and Systemic Responses to SARS-CoV-2 Antigen
Source: MDPI journal article supplement (doi:10.3390/vaccines11020334), 2023-02-02
Supplement: s1 [file s1]

**Table S3.** List of differentially expressed proteins in nasal explant culture supernatants and plasma<sup>1</sup>.

| Protein               | Definition <sup>2</sup>                                       | Tissue vs.<br>Plasma FC | <i>P</i> value |
|-----------------------|---------------------------------------------------------------|-------------------------|----------------|
| IL-7                  | Homo sapiens interleukin 7                                    | 200.867                 | < 0.0001       |
| IL-6                  | Homo sapiens interleukin 6                                    | 1,674.125               | 0.0066         |
| G-CSF                 | Homo sapiens granulocyte colony-stimulating factor receptor   | 160.322                 | < 0.0001       |
| IL-8                  | Homo sapiens interleukin 8                                    | 47,626.175              | 0.0117         |
| MCP-1                 | Homo sapiens monocyte chemotactic protein-induced protein 1   | 22.078                  | 0.0004         |
| MIP-3 $\alpha$ /CCL20 | Homo sapiens macrophage inflammatory protein 3 alpha          | 632.631                 | < 0.0001       |
| GM-CSF                | Homo sapiens granulocyte-macrophage colony-stimulating factor | 0.705                   | 0.0035         |
| IP-10/CXCL10          | Homo sapiens 10 kDa interferon gamma-induced protein          | 0.650                   | 0.2552         |
| MIG/CXCL9             | Homo sapiens monokine-induced by interferon gamma             | 0.875                   | 0.5293         |
| IL-16                 | Homo sapiens interleukin 16                                   | 1.338                   | 0.0160         |
| IL-2                  | Homo sapiens interleukin 2                                    | 3.427                   | < 0.0001       |
| MCP-2/CCL8            | Homo sapiens monocyte chemoattractant protein 2               | 0.654                   | < 0.0001       |
| IL-4                  | Homo sapiens interleukin 4                                    | 0.815                   | 0.0004         |
| MIP-1 $\beta$ /CCL4   | Homo sapiens macrophage inflammatory protein 1 beta           | 1.596                   | 0.1726         |
| SDF-1 $\beta$         | Homo sapiens stromal cell-derived factor 1 beta               | 0.704                   | 0.0112         |
| IFN- $\gamma$         | Homo sapiens interferon-gamma                                 | 0.953                   | 0.5822         |
| IFN- $\beta$          | Homo sapiens interferon-beta                                  | 0.594                   | < 0.0001       |
| TNF- $\alpha$         | Homo sapiens tumor necrosis factor alpha                      | 0.775                   | 0.0870         |
| IL-12                 | Homo sapiens interleukin 12                                   | 0.691                   | 0.0066         |
| RANTES/CCL5           | Homo sapiens chemokine (C-C motif) ligand 5                   | 0.104                   | 0.0005         |
| IL-1 $\alpha$         | Homo sapiens interleukin 1 alpha                              | 6.827                   | 0.1677         |
| TGF- $\beta$          | Homo sapiens transforming growth factor beta                  | 5.607                   | 0.2074         |
| IL-1 $\beta$          | Homo sapiens interleukin 1 beta                               | 1.045                   | 0.8456         |
| IL-15                 | Homo sapiens interleukin 15                                   | 0.691                   | 0.0050         |
| IL-17                 | Homo sapiens interleukin 17                                   | 10.115                  | < 0.0001       |
| L-Selectin            | Homo sapiens leukocyte-endothelial cell adhesion molecule 1   | 0.001                   | < 0.0001       |
| Elafin                | Homo sapiens elastase-specific inhibitor,                     | 5.985                   | 0.0043         |
| IL-10                 | Homo sapiens interleukin 10                                   | 3.197                   | < 0.0001       |
| HBD4                  | Homo sapiens beta defensin 4                                  | 5.441                   | < 0.0001       |
| HBD3                  | Homo sapiens beta defensin 3                                  | 4.327                   | < 0.0001       |
| SLP1                  | Homo sapiens secretory leukocyte protease inhibitor 1         | 25.528                  | 0.0726         |
| HNP-1-3               | Homo sapiens alpha-defensin/human neutrophil peptide 1-3      | 5.448                   | < 0.0001       |
| P-Selectin            | Homo sapiens leukocyte-endothelial cell adhesion molecule 3   | 6.840                   | < 0.0001       |

<sup>1</sup>Significance determined by unpaired *t* test with a Benjamini-Hochberg multiple testing correction (*P* < 0.05).<sup>2</sup>UnitProt definitions.

FC: Fold change.
